# Supplementary material for: MicroRNA-146a Promotes Embryonic Stem Cell Differentiation towards Vascular Smooth Muscle Cells through Regulation of Kruppel-like Factor 4
Source: Springer Nature journal article supplement (doi:10.1007/s11596-023-2736-3), 2023-04-01
Supplement: MOESM1 [file 11596_2023_2736_MOESM1_ESM.pdf]

Supplementary data

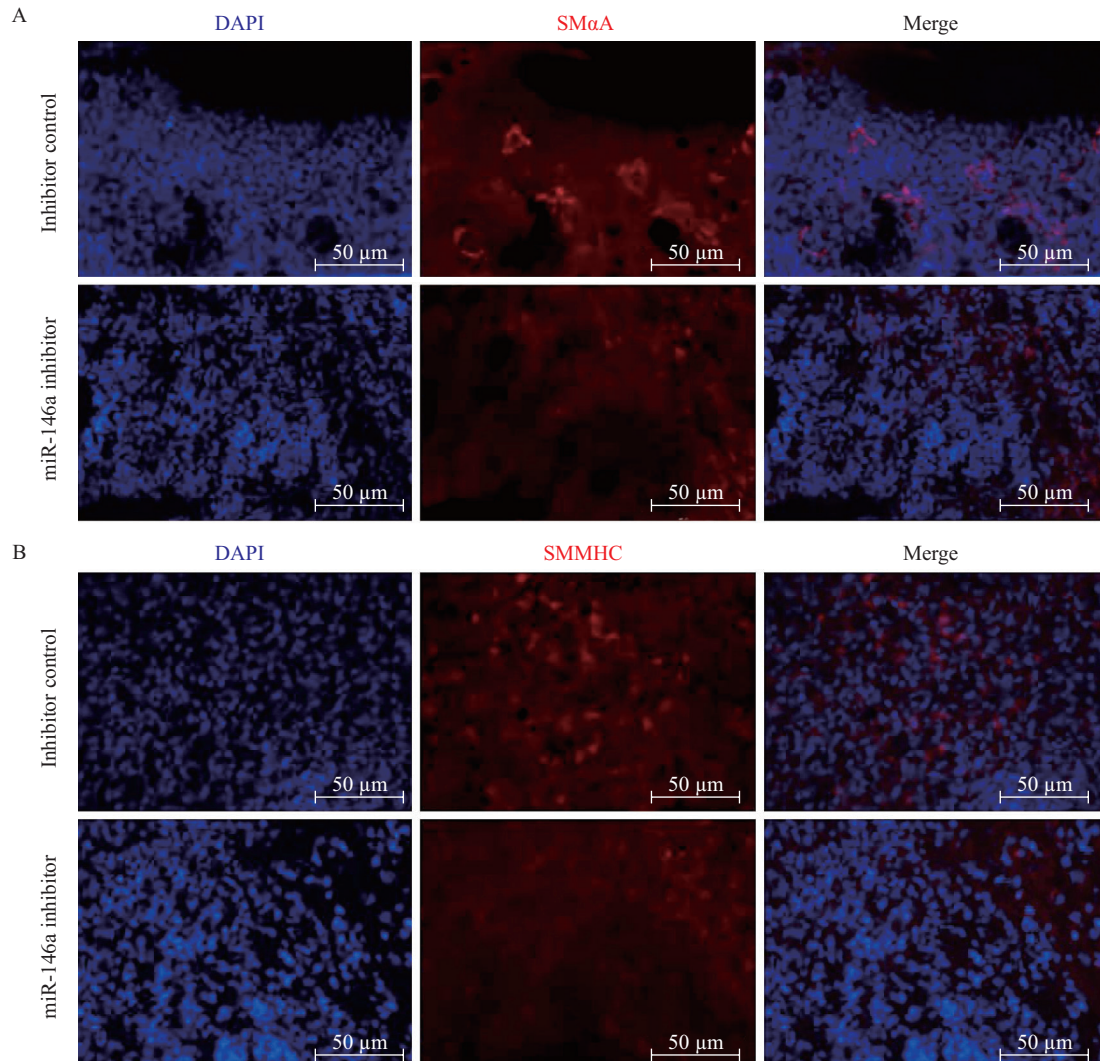

**Fig. S1** Downregulation of miR-146a inhibits VSMCs differentiation from ESCs *in vivo*  
A and B: Matrigel plugs implanted with ESCs without (inhibitor control) or with (miR-146a inhibitor) miR-146a inhibition were injected subcutaneously into mice. The plugs were harvested at 10th day and were sectioned and subjected to immunofluorescent staining using antibodies against SMαA/SMMHC. ESCs: embryonic stem cells; SMαA: smooth muscle-actin; SMMHC: smooth muscle myosin heavy chain; VSMCs: Vascular smooth muscle cells

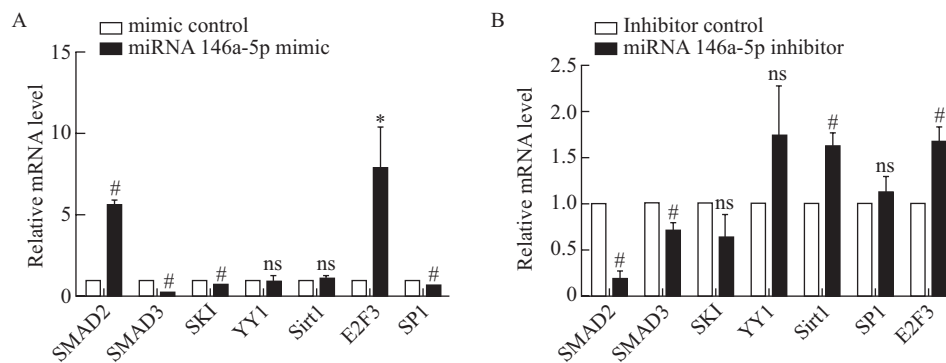

**Fig. S2** Expression of some potential target genes of miR-146a  
RNAs of 3-day differentiating ESCs transfected by miR-146a mimic (A) or miR-146a inhibitor (B) was extracted for RT-qPCR.  
\* $P < 0.05$ , # $P < 0.01$ . ESCs: embryonic stem cells
